# Supplementary material for: Immunologically “cold” triple negative breast cancers engraft at a higher rate in patient derived xenografts
Source: PubMed Central journal article supplement (PMC9464188; doi:10.1038/s41523-022-00476-0), 2022-09-10
Supplement: 41523_2022_476_MOESM1_ESM.pdf [file 41523_2022_476_MOESM1_ESM.pdf]

Supplementary Table 1

Top 20 pathways in GO analysis (hypergeometric test)

|            | Pathway                                             | Genes<br>Total | DE<br>genes | P-value    |
|------------|-----------------------------------------------------|----------------|-------------|------------|
| GO:0001775 | cell activation                                     | 1482           | 8           | 0.00566265 |
| GO:0002252 | immune effector process                             | 1299           | 9           | 0.00056144 |
| GO:0002263 | cell activation involved in immune response         | 720            | 8           | 4.89E-05   |
| GO:0002274 | myeloid leukocyte activation                        | 662            | 7           | 0.00020949 |
| GO:0002275 | myeloid cell activation involved in immune response | 549            | 7           | 6.55E-05   |
| GO:0002283 | neutrophil activation involved in immune response   | 490            | 7           | 3.19E-05   |
| GO:0002366 | leukocyte activation involved in immune response    | 716            | 8           | 4.70E-05   |
| GO:0002376 | immune system process                               | 3287           | 13          | 0.00553053 |
| GO:0002443 | leukocyte mediated immunity                         | 892            | 8           | 0.00021621 |
| GO:0002444 | myeloid leukocyte mediated immunity                 | 555            | 7           | 7.02E-05   |
| GO:0002446 | neutrophil mediated immunity                        | 501            | 7           | 3.68E-05   |
| GO:0006810 | transport                                           | 5224           | 19          | 0.00131266 |
| GO:0006887 | exocytosis                                          | 914            | 7           | 0.00142956 |
| GO:0006955 | immune response                                     | 2306           | 13          | 0.00019558 |

|            |                          |      |   |            |
|------------|--------------------------|------|---|------------|
| GO:0032940 | secretion by cell        | 1436 | 9 | 0.0011524  |
| GO:0036230 | granulocyte activation   | 509  | 7 | 4.06E-05   |
| GO:0042119 | neutrophil activation    | 502  | 7 | 3.72E-05   |
| GO:0043299 | leukocyte degranulation  | 537  | 7 | 5.70E-05   |
| GO:0043312 | neutrophil degranulation | 487  | 7 | 3.07E-05   |
| GO:0045055 | regulated exocytosis     | 797  | 7 | 0.00064152 |

Supplementary Table 2

PDX Characterization

| PDX      | Collection | ER IHC=  | PR IHC   | HER2 IHC |
|----------|------------|----------|----------|----------|
| BCM-0002 | BCM        | Negative | Negative | Negative |
| BCM-0046 | BCM        | Negative | Negative | Negative |
| BCM-0049 | BCM        | Negative | Negative | Negative |
| BCM-0104 | BCM        | Negative | Negative | Negative |
| BCM-0113 | BCM        | Negative | Negative | Negative |
| BCM-0132 | BCM        | Negative | Negative | Negative |
| BCM-2147 | BCM        | Negative | Negative | Negative |
| BCM-2277 | BCM        | Negative | Negative | Negative |
| BCM-2665 | BCM        | Negative | Negative | Negative |
| BCM-3107 | BCM        | Negative | Negative | Negative |
| BCM-3204 | BCM        | Negative | Negative | Negative |
| BCM-3469 | BCM        | Negative | Negative | Negative |
| BCM-3561 | BCM        | Negative | Negative | Negative |
| BCM-3611 | BCM        | Negative | Negative | Negative |
| BCM-3807 | BCM        | Negative | Negative | Negative |
| BCM-3887 | BCM        | Negative | Negative | Negative |
| BCM-3904 | BCM        | Negative | Negative | Negative |
| BCM-3936 | BCM        | Negative | Negative | Negative |
| BCM-4013 | BCM        | Negative | Negative | Negative |
| BCM-4175 | BCM        | Negative | Negative | Negative |
| BCM-4195 | BCM        | Negative | Negative | Negative |
| BCM-4272 | BCM        | Negative | Negative | Negative |
| BCM-4400 | BCM        | Negative | Negative | Negative |
| BCM-4664 | BCM        | Negative | Negative | Negative |
| BCM-4849 | BCM        | Negative | Negative | Negative |
| BCM-4913 | BCM        | Negative | Negative | Negative |
| BCM-5156 | BCM        | Negative | Negative | Negative |
| BCM-5438 | BCM        | Negative | Negative | Negative |
| BCM-5471 | BCM        | Negative | Negative | Negative |
| BCM-5998 | BCM        | Negative | Negative | Negative |
| BCM-6257 | BCM        | Negative | Negative | Negative |
| BCM-7482 | BCM        | Negative | Negative | Negative |
| BCM-7563 | BCM        | Negative | Negative | Negative |
| BCM-7649 | BCM        | Negative | Negative | Negative |

|           |     |          |          |          |
|-----------|-----|----------|----------|----------|
| BCM-7821  | BCM | Negative | Negative | Negative |
| BCM-8563  | BCM | Negative | Negative | Negative |
| BCM-9161  | BCM | Negative | Negative | Negative |
| BCM-15003 | BCM | Negative | Negative | Negative |
| BCM-15006 | BCM | Negative | Negative | Negative |
| BCM-15029 | BCM | Negative | Negative | Negative |
| BCM-15046 | BCM | Negative | Negative | Negative |
| BCM-15051 | BCM | Negative | Negative | Negative |
| BCM-15115 | BCM | Negative | Negative | Negative |
| BRA45     | BCM | Negative | Negative | Negative |
| BRA74     | BCM | Negative | Negative | Negative |
| GUM07     | BCM | Negative | Negative | Negative |
| GUM13     | BCM | Negative | Negative | Negative |
| GUM17     | BCM | Negative | Negative | Negative |
| GUM30     | BCM | Negative | Negative | Negative |
| MC1       | BCM | Negative | Negative | Negative |
| HCI-001   | HCI | Negative | Negative | Negative |
| HCI-002   | HCI | Negative | Negative | Negative |
| HCI-003   | HCI | Negative | Negative | Negative |
| HCI-004   | HCI | Negative | Negative | Negative |
| HCI-005   | HCI | Negative | Negative | Negative |
| HCI-006   | HCI | Negative | Negative | Negative |
| HCI-007   | HCI | Negative | Negative | Negative |
| HCI-008   | HCI | Negative | Negative | Negative |
| HCI-009   | HCI | Negative | Negative | Negative |
| HCI-010   | HCI | Negative | Negative | Negative |
| HCI-011   | HCI | Negative | Negative | Negative |
| HCI-012   | HCI | Negative | Negative | Negative |
| HCI-013   | HCI | Negative | Negative | Negative |
| HCI-015   | HCI | Negative | Negative | Negative |
| HCI-016   | HCI | Negative | Negative | Negative |
| HCI-017   | HCI | Negative | Negative | Negative |
| HCI-018   | HCI | Negative | Negative | Negative |
| HCI-019   | HCI | Negative | Negative | Negative |
| HCI-023   | HCI | Negative | Negative | Negative |
| HCI-024   | HCI | Negative | Negative | Negative |
| HCI-025   | HCI | Negative | Negative | Negative |
| HCI-026   | HCI | Negative | Negative | Negative |
| HCI-027   | HCI | Negative | Negative | Negative |

|                         |                 |          |          |          |
|-------------------------|-----------------|----------|----------|----------|
| HCI-028                 | HCI             | Negative | Negative | Negative |
| HCI-030                 | HCI             | Negative | Negative | Negative |
| HCI-041                 | HCI             | Negative | Negative | Negative |
| WHIM2                   | WHIM            | Negative | Negative | Negative |
| WHIM6                   | WHIM            | Negative | Negative | Negative |
| WHIM12                  | WHIM            | Negative | Negative | Negative |
| WHIM14                  | WHIM            | Negative | Negative | Negative |
| WHIM30                  | WHIM            | Negative | Negative | Negative |
| WHIM68                  | WHIM            | Negative | Negative | Negative |
| WHIM69                  | WHIM            | Negative | Negative | Negative |
| WHIM74                  | WHIM            | Negative | Negative | Negative |
| WHIM75                  | WHIM            | Negative | Negative | Negative |
| 144163                  | UOM-BC          | Negative | Negative | Negative |
| 144201                  | UOM-BC          | Negative | Negative | Negative |
| 150467                  | NKI             | Negative | Negative | Negative |
| 144237                  | UOM-BC          | Negative | Negative | Negative |
| 144246                  | UOM-BC          | Negative | Negative | Negative |
| 150427                  | NKI             | Negative | Negative | Negative |
| 150452                  | NKI             | Negative | Negative | Negative |
| 150499                  | NKI             | Negative | Negative | Negative |
| 144184                  | UOM-BC          | Negative | Negative | Negative |
| 150483                  | NKI             | Negative | Negative | Negative |
| 150439                  | NKI             | Negative | Negative | Negative |
| 193832_AL-JGF           | NCI PDMR Models | Negative | Negative | Negative |
| 193832_AL-JGF_AL-WF0    | NCI PDMR Models | Negative | Negative | Negative |
| 193832_AL-JGF_AL-WF4    | NCI PDMR Models | Negative | Negative | Negative |
| 193832_AL-JGK           | NCI PDMR Models | Negative | Negative | Negative |
| 193832_AL-JGK_AL-W50    | NCI PDMR Models | Negative | Negative | Negative |
| 412248_QXC              | NCI PDMR Models | Negative | Negative | Negative |
| 412248_QXCXA7           | NCI PDMR Models | Negative | Negative | Negative |
| 412248_QXTTN3WN6        | NCI PDMR Models | Negative | Negative | Negative |
| 412248_QXTTN4           | NCI PDMR Models | Negative | Negative | Negative |
| 412248_QXTTN7           | NCI PDMR Models | Negative | Negative | Negative |
| 412248_QXUVX9           | NCI PDMR Models | Negative | Negative | Negative |
| 414838_AL-Y5CXC8YA9     | NCI PDMR Models | Negative | Negative | Negative |
| 414838_AL-Y5C_AL-XC6    | NCI PDMR Models | Negative | Negative | Negative |
| 414838_AL-Y5E           | NCI PDMR Models | Negative | Negative | Negative |
| 414838_AL-Y5EWY7        | NCI PDMR Models | Negative | Negative | Negative |
| 414838_AL-Y5E_AL-WY3YK7 | NCI PDMR Models | Negative | Negative | Negative |

|                                           |                 |          |          |          |
|-------------------------------------------|-----------------|----------|----------|----------|
| 414838_AL-Y5F_AL-XW4                      | NCI PDMR Models | Negative | Negative | Negative |
| 415267_AK3                                | NCI PDMR Models | Negative | Negative | Negative |
| 415267_AK3JG4                             | NCI PDMR Models | Negative | Negative | Negative |
| 415267_AK3JG5K66                          | NCI PDMR Models | Negative | Negative | Negative |
| 415267_AK3JG5K68C67                       | NCI PDMR Models | Negative | Negative | Negative |
| 415267_AK3JJ0C83                          | NCI PDMR Models | Negative | Negative | Negative |
| 415267_AK6                                | NCI PDMR Models | Negative | Negative | Negative |
| 447297_AL-WYC                             | NCI PDMR Models | Negative | Negative | Negative |
| 447297_AL-WYC_AL-GV6                      | NCI PDMR Models | Negative | Negative | Negative |
| 447297_AL-WYC_AL-GV7                      | NCI PDMR Models | Negative | Negative | Negative |
| 447297_AL-WYC_AL-GV7_AL-A32_AL-N37_AL-T78 | NCI PDMR Models | Negative | Negative | Negative |
| 447297_AL-WYC_AL-GV7_AL-A32_AL-N45        | NCI PDMR Models | Negative | Negative | Negative |
| 556579_UWTJT3                             | NCI PDMR Models | Negative | Negative | Negative |
| 556579_UWU                                | NCI PDMR Models | Negative | Negative | Negative |
| 556579_UWUJJ0KX2                          | NCI PDMR Models | Negative | Negative | Negative |
| 556579_UWUJJ1_RG-PV8                      | NCI PDMR Models | Negative | Negative | Negative |
| 556579_UWUJJ3                             | NCI PDMR Models | Negative | Negative | Negative |
| 556579_UWVJT7                             | NCI PDMR Models | Negative | Negative | Negative |
| 562452_AL-KV5P13                          | NCI PDMR Models | Negative | Negative | Negative |
| 562452_AL-KV7_AL-C01P33                   | NCI PDMR Models | Negative | Negative | Negative |
| 562452_AL-KV7_AL-C02                      | NCI PDMR Models | Negative | Negative | Negative |
| 562452_AL-KV8                             | NCI PDMR Models | Negative | Negative | Negative |
| 562452_AL-KV9                             | NCI PDMR Models | Negative | Negative | Negative |
| 562452_AL-KV9_AL-J89                      | NCI PDMR Models | Negative | Negative | Negative |
| 731979_AL-VAY_AL-W08                      | NCI PDMR Models | Negative | Negative | Negative |
| 731979_AL-VAY_AL-W10                      | NCI PDMR Models | Negative | Negative | Negative |
| 731979_AL-VAY_AL-W13_AL-P28               | NCI PDMR Models | Negative | Negative | Negative |
| 731979_AL-VAY_AL-W13_AL-P28_AL-U19        | NCI PDMR Models | Negative | Negative | Negative |
| 731979_AL-VAY_AL-W13_AL-P30               | NCI PDMR Models | Negative | Negative | Negative |
| 731979_AL-VJW                             | NCI PDMR Models | Negative | Negative | Negative |
| 868763_AL-N2P                             | NCI PDMR Models | Negative | Negative | Negative |
| 868763_AL-N2P_AL-Y21                      | NCI PDMR Models | Negative | Negative | Negative |
| 868763_AL-N3P                             | NCI PDMR Models | Negative | Negative | Negative |
| 868763_AL-N3P_AL-X21                      | NCI PDMR Models | Negative | Negative | Negative |
| 868763_AL-NTT_AL-X86                      | NCI PDMR Models | Negative | Negative | Negative |

|                               |                 |          |          |          |
|-------------------------------|-----------------|----------|----------|----------|
| 868763_AL-NTT_AL-X92          | NCI PDMR Models | Negative | Negative | Negative |
| 885512_AL-KAE_AL-Q12          | NCI PDMR Models | Negative | Negative | Negative |
| 885512_AL-KAF                 | NCI PDMR Models | Negative | Negative | Negative |
| 885512_AL-KAF_AL-Q24          | NCI PDMR Models | Negative | Negative | Negative |
| 885512_AL-KAG_AL-Q33          | NCI PDMR Models | Negative | Negative | Negative |
| 885512_AL-KAG_AL-Q34_AL-T39   | NCI PDMR Models | Negative | Negative | Negative |
| 885512_AL-KAW_AL-Q88          | NCI PDMR Models | Negative | Negative | Negative |
| 974727_OT-PPJ                 | NCI PDMR Models | Negative | Negative | Negative |
| 974727_OT-PPJ_OT-UH0YJ3       | NCI PDMR Models | Negative | Negative | Negative |
| 974727_OT-PPJ_OT-UH3XX0       | NCI PDMR Models | Negative | Negative | Negative |
| 974727_OT-PPJ_OT-UH3XX3CK1    | NCI PDMR Models | Negative | Negative | Negative |
| 974727_OT-PPJ_OT-UH3XX3CK4F16 | NCI PDMR Models | Negative | Negative | Negative |
| 974727_OT-PPJ_OT-UH5          | NCI PDMR Models | Negative | Negative | Negative |
| 994819_OT-FWCP10              | NCI PDMR Models | Negative | Negative | Negative |
| 994819_OT-FWF                 | NCI PDMR Models | Negative | Negative | Negative |
| 994819_OT-FWFP18_RG-N13       | NCI PDMR Models | Negative | Negative | Negative |
| 994819_OT-FWFP18_RG-N15       | NCI PDMR Models | Negative | Negative | Negative |
| 994819_OT-FWFP18_RG-N15K11    | NCI PDMR Models | Negative | Negative | Negative |
| 994819_OT-FWFP19              | NCI PDMR Models | Negative | Negative | Negative |

### Supplementary Table 3

#### Datasets Utilized

| Collection    | Tumor Type    | Number of Samples | Resource Location                                                                                       |
|---------------|---------------|-------------------|---------------------------------------------------------------------------------------------------------|
| TCGA TNBC     | Primary Human | 100 TNBC          | <a href="https://tcga.xenahubs.net">https://tcga.xenahubs.net</a>                                       |
| BCM (Patient) | Primary Human | 45                | <a href="https://pdxportal.research.bcm.edu">https://pdxportal.research.bcm.edu</a><br>mtlewis@bcm.edu  |
| NKI (Patient) | Primary Human | 5                 | <a href="https://www.pdxfinder.org/">https://www.pdxfinder.org/</a>                                     |
| HCI (Patient) | Primary Human | 12                | alana.welm@hci.utah.edu                                                                                 |
| BCM and HCI   | PDX           | 76 TNBC PDXs      | <a href="https://pdxportal.research.bcm.edu">https://pdxportal.research.bcm.edu</a>                     |
| NCI PDMR      | PDX           | 70 TNBC PDX       | <a href="https://pdmr.cancer.gov/database/default.htm">https://pdmr.cancer.gov/database/default.htm</a> |
| NKI           | PDX           | 6 TNBC PDX        | <a href="https://www.pdxfinder.org/">https://www.pdxfinder.org/</a>                                     |
| UOM-BC        | PDX           | 5 TNBC PDX        | <a href="https://www.pdxfinder.org/">https://www.pdxfinder.org/</a>                                     |
| WHIM          | PDX           | 9 TNBC PDX        | <a href="https://www.envigo.com/whim-pdx-models">https://www.envigo.com/whim-pdx-models</a>             |
